# Supplementary material
Source: publisher site journal article supplement (https://www.spandidos-publications.com/6064/downloadSupplementary)

Figure S1. Impact of SLCO4A1 expression levels on the survival of patients with NSCLC. (A) According to the TCGA and Gene Expression Omnibus databases, patients with high expression of SLCO4A1 have a poorer prognosis. (B) According to the HPA database, patients with high expression of SLCO4A1 have a poorer prognosis. SLCO4A1, solute carrier organic anion transporter family member 4A1; TCGA, The Cancer Genome Atlas; HPA, Human Protein Atlas.

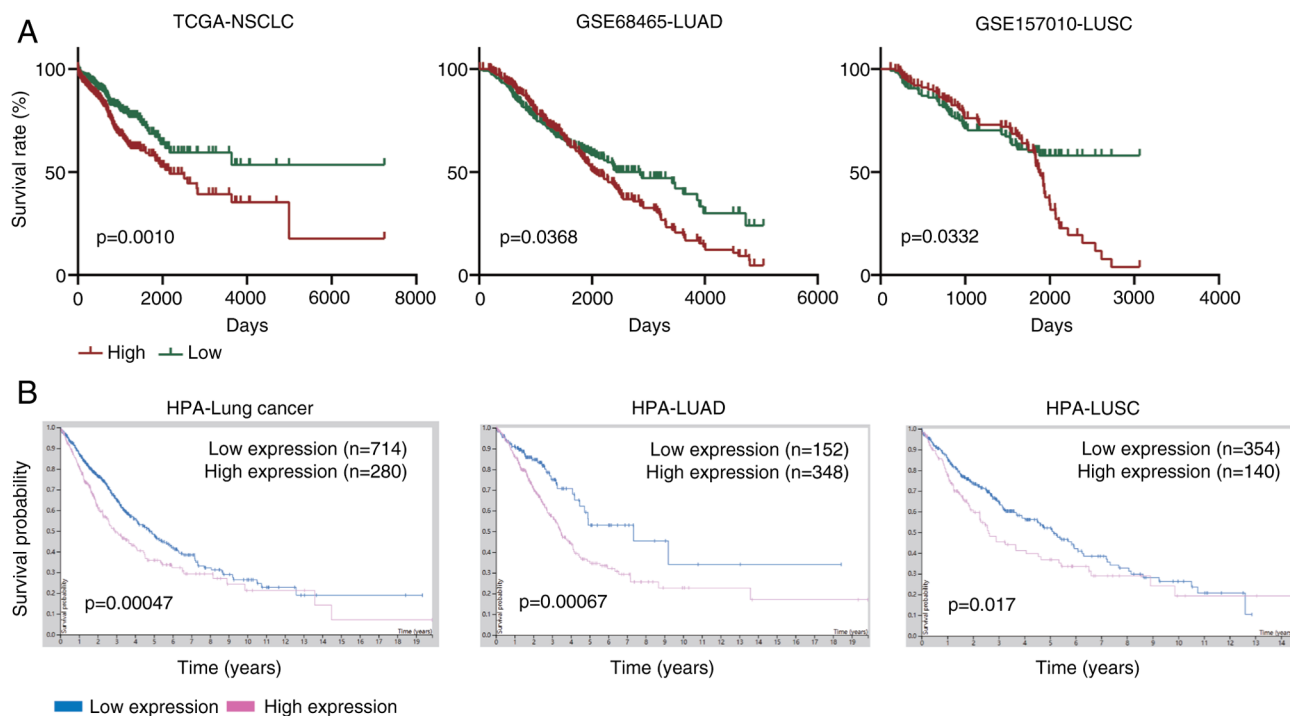

Supplement: Supplementary file 1 [file downloadSupplementary]
